# Supplementary material
Source: PubMed Central journal article supplement (PMC9381789)
Supplement: 41396_2022_1257_MOESM1_ESM.pdf [file 41396_2022_1257_MOESM1_ESM.pdf]

# Supplementary Materials

## Diversity of Organohalide Respiring Bacteria and Reductive Dehalogenases that Detoxify Polybrominated Diphenyl Ethers in E-waste Recycling Sites

Siyan Zhao<sup>1</sup>, Chang Ding<sup>2</sup>, Guofang Xu<sup>1,3</sup>, Matthew J. Rogers<sup>1</sup>, Rajaganesan Ramaswamy<sup>1,3</sup>, Jianzhong He<sup>1\*</sup>

<sup>1</sup>Department of Civil and Environmental Engineering, National University of Singapore, Singapore 117576

<sup>2</sup>Helmholtz Centre for Environmental Research – UFZ, Isotope Biogeochemistry, Permoserstraße 15, 04318 Leipzig, Germany

<sup>3</sup>NUS Graduate School - Integrative Sciences and Engineering Programme (ISEP), National University of Singapore, Singapore 119077

\* Corresponding author:

Department of Civil and Environmental Engineering

National University of Singapore

Block E2-02-13

1 Engineering Drive 3, Singapore 117576

Phone: (65) 6516-3385; Fax: (65) 6779-1635

Email: [jianzhong.he@nus.edu.sg](mailto:jianzhong.he@nus.edu.sg)

### Key words:

Polybrominated diphenyl ethers (PBDEs), reductive debromination, PBDE RDases, debromination pathways, *Dehalococcoides*

## Supplementary Figures

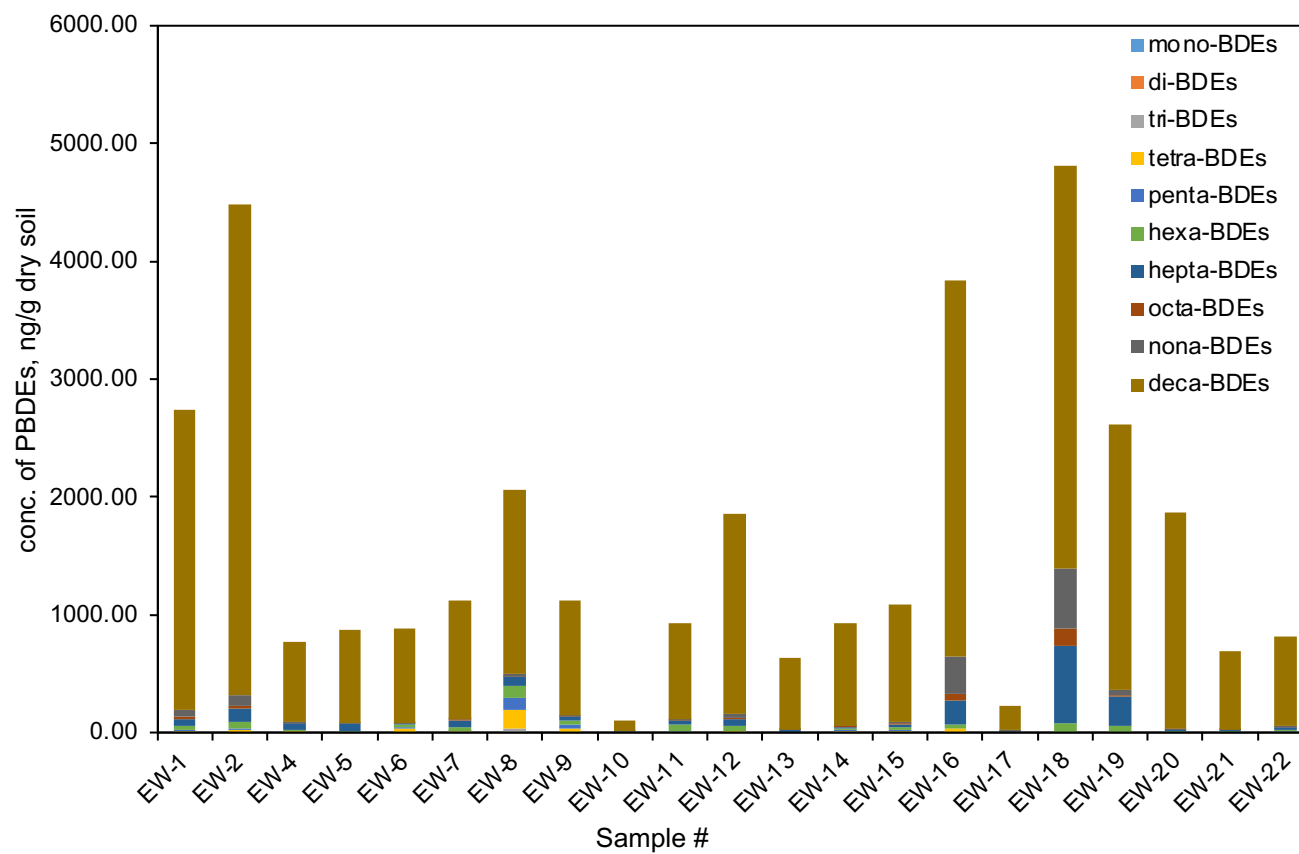

**Figure S1.** Concentration of PBDE homolog groups in e-waste soils collected in this study. Concentrations of individual PBDE congeners are available in Supplementary Dataset Table S10.

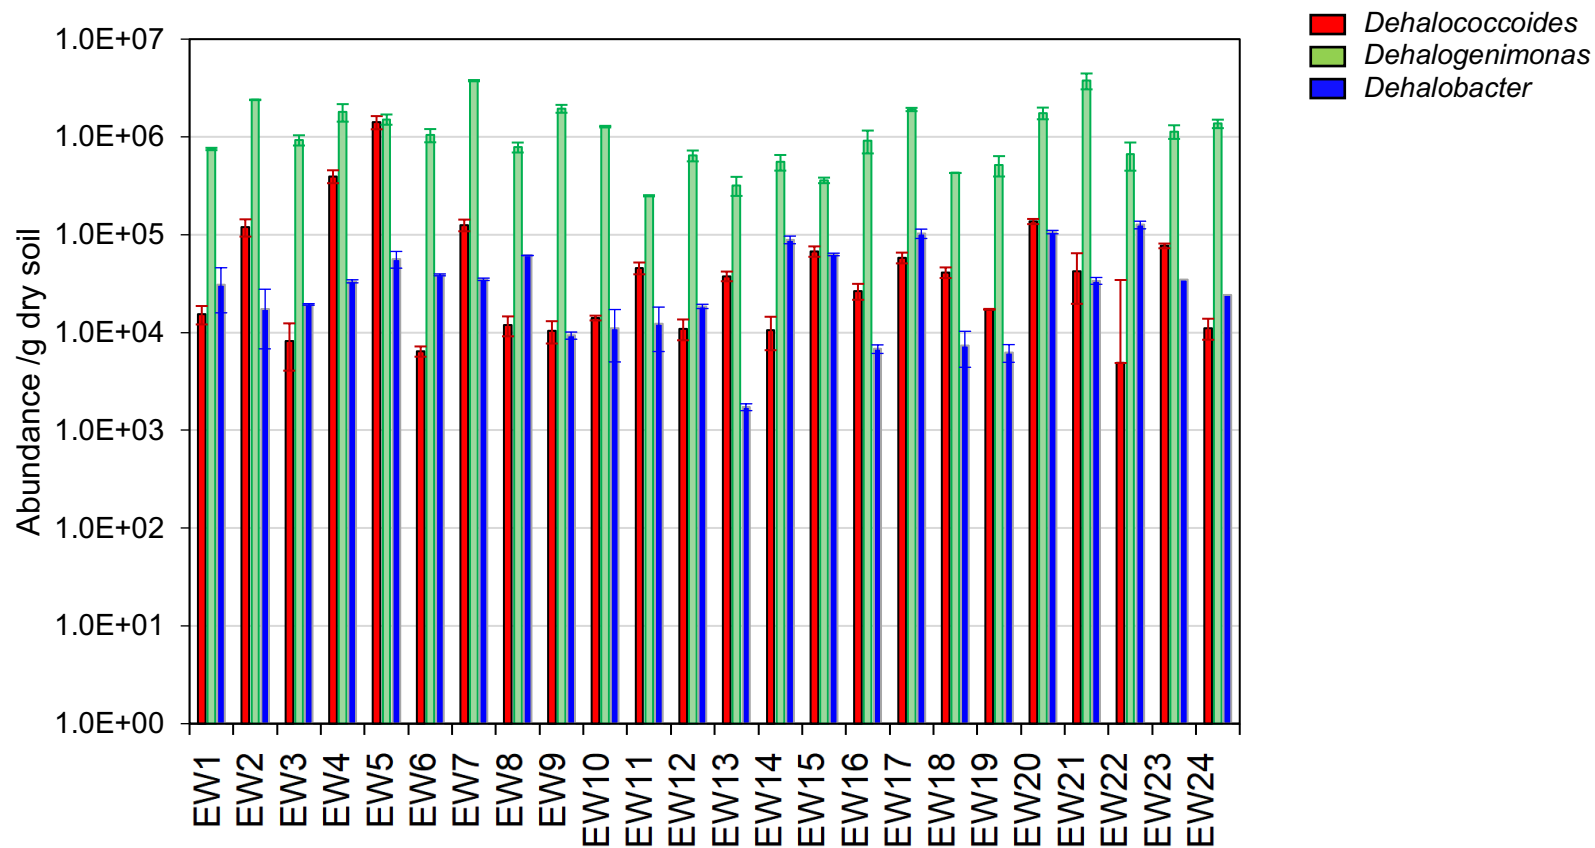

**Figure S2.** Abundance of obligate OHRB (*Dehalococcoides*, *Dehalogenimonas* and *Dehalobacter*) in soils and sediments collected from 24 e-waste contaminated sites.

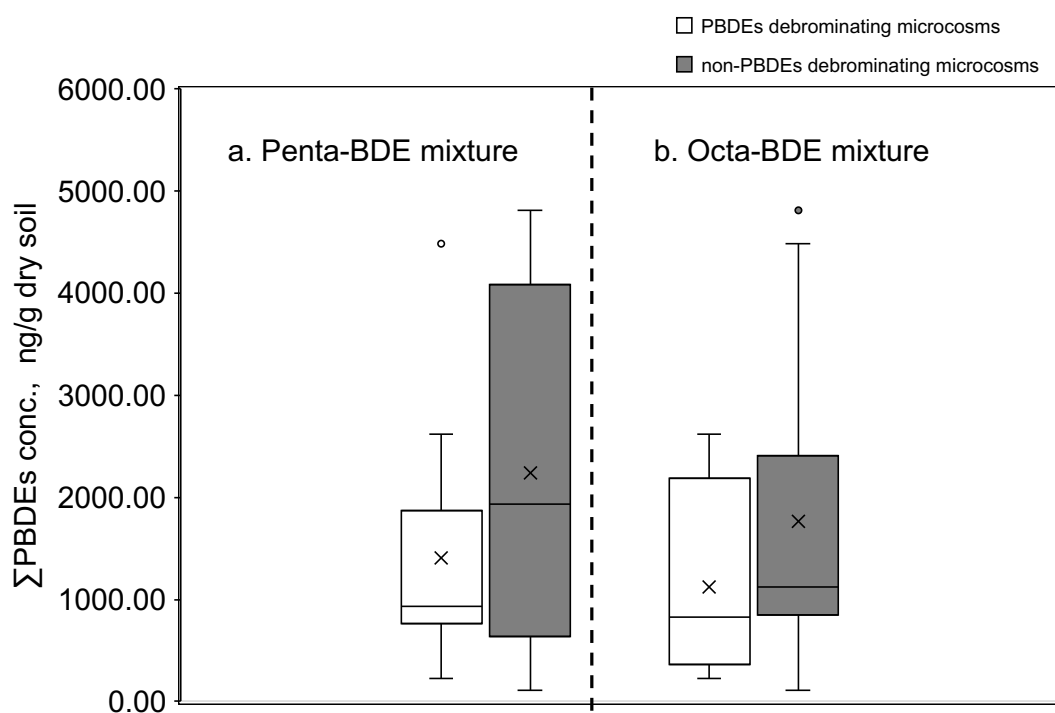

**Figure S3.** Boxplots of *in situ*  $\Sigma$  PBDEs in microcosms. There was no significant difference in the mean  $\Sigma$  PBDEs in soil samples which showed debromination of either the penta- or octa-BDE mixture (t-test,  $p < 0.05$ ). The penta-BDE mixture debrominating microcosms comprised EW-2, -3, -4, -5, -6, -7, -8, -11, -12, -13, -14, -15, -17, -19, -20, -21, and the octa-BDE mixture debrominating group comprised EW-4, -6, -17, -19. The concentrations of PBDEs in original soils, water content, and organic content of the original soils are available in Supplementary Dataset Table S10.

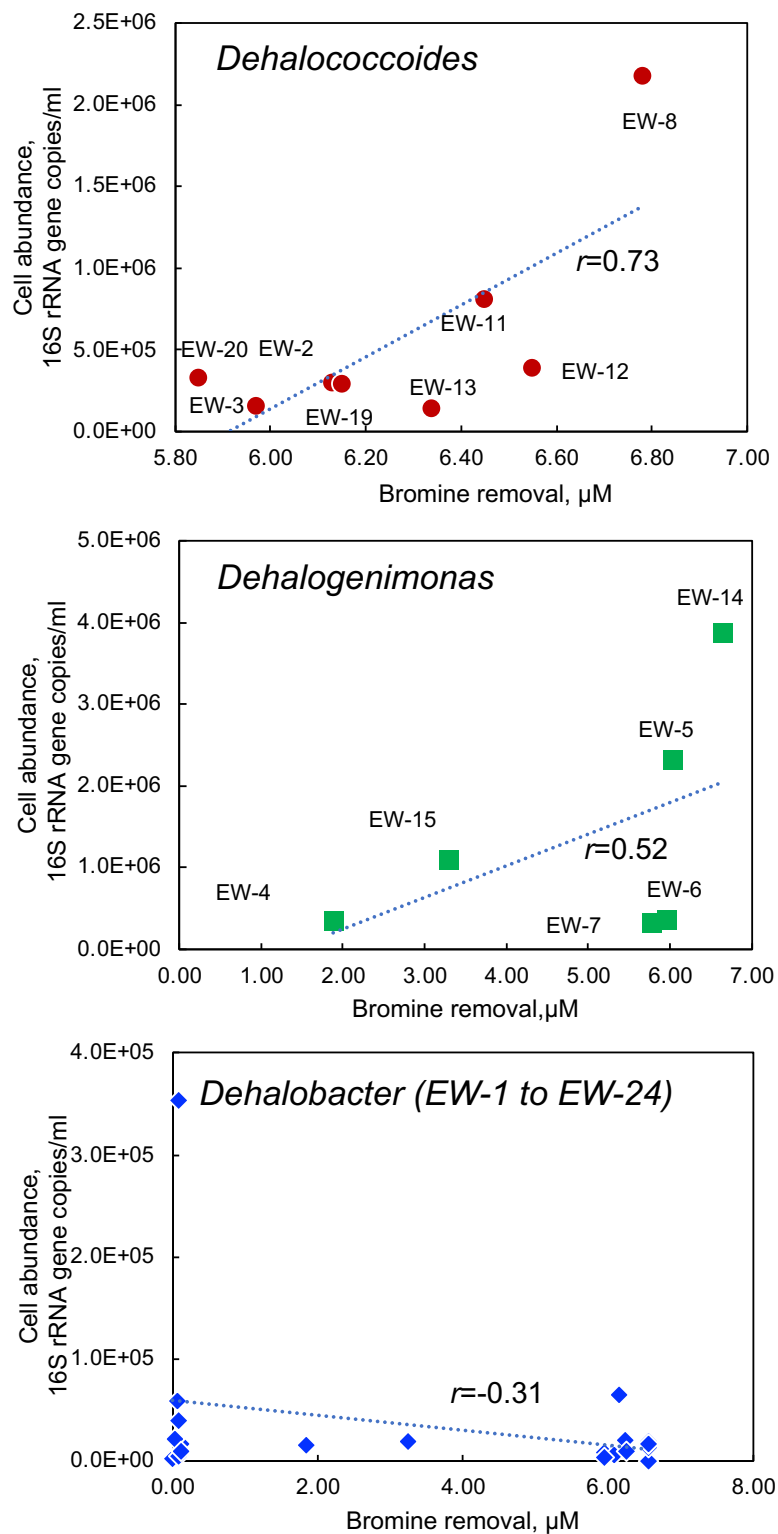

**Figure S4.** Correlations between the abundance of obligate OHRB and debromination of a penta-BDE mixture in microcosms.

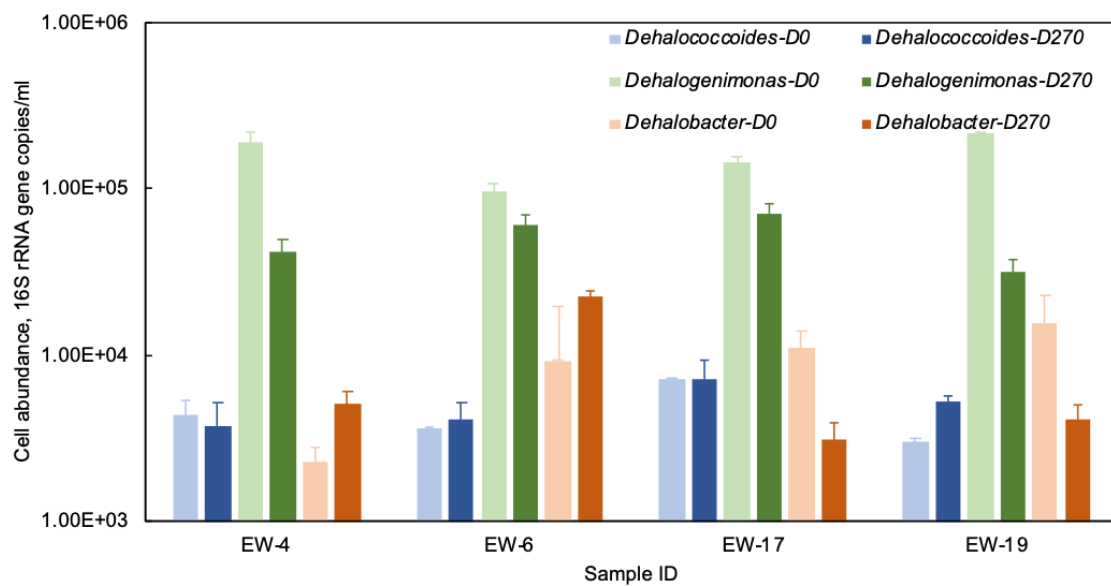

**Figure S5.** Change in abundance of obligate organohalide respiring bacteria genera (i.e., *Dehalococcoides*, *Dehalogenimonas*, and *Dehalobacter*) in four microcosms that showed debrominating activity of an octa-BDE mixture after 270 days' incubation. The microcosms were established from soil and sediments collected from geographically distinct e-waste contaminated sites. The cell abundance was measured on day0 (D0) and day270 (D270).

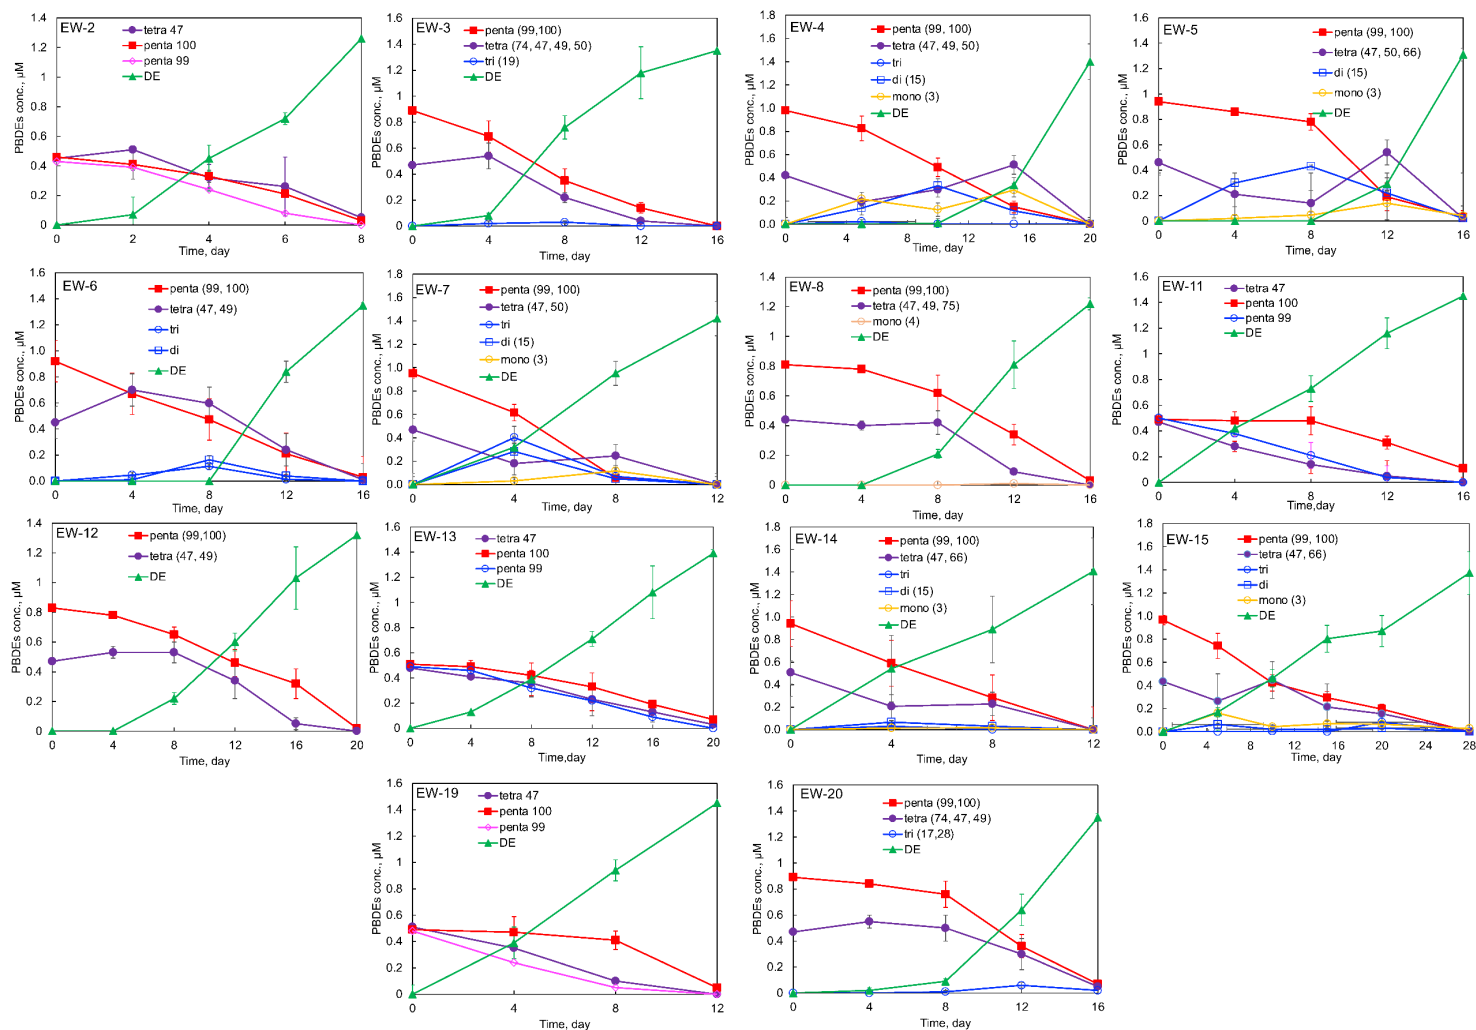

**Figure S6.** Debromination of a tetra- and penta-BDE mixture by enrichment cultures derived from PBDE debrominating microcosms. Kinetics data is available in Supplementary Dataset Table S11.

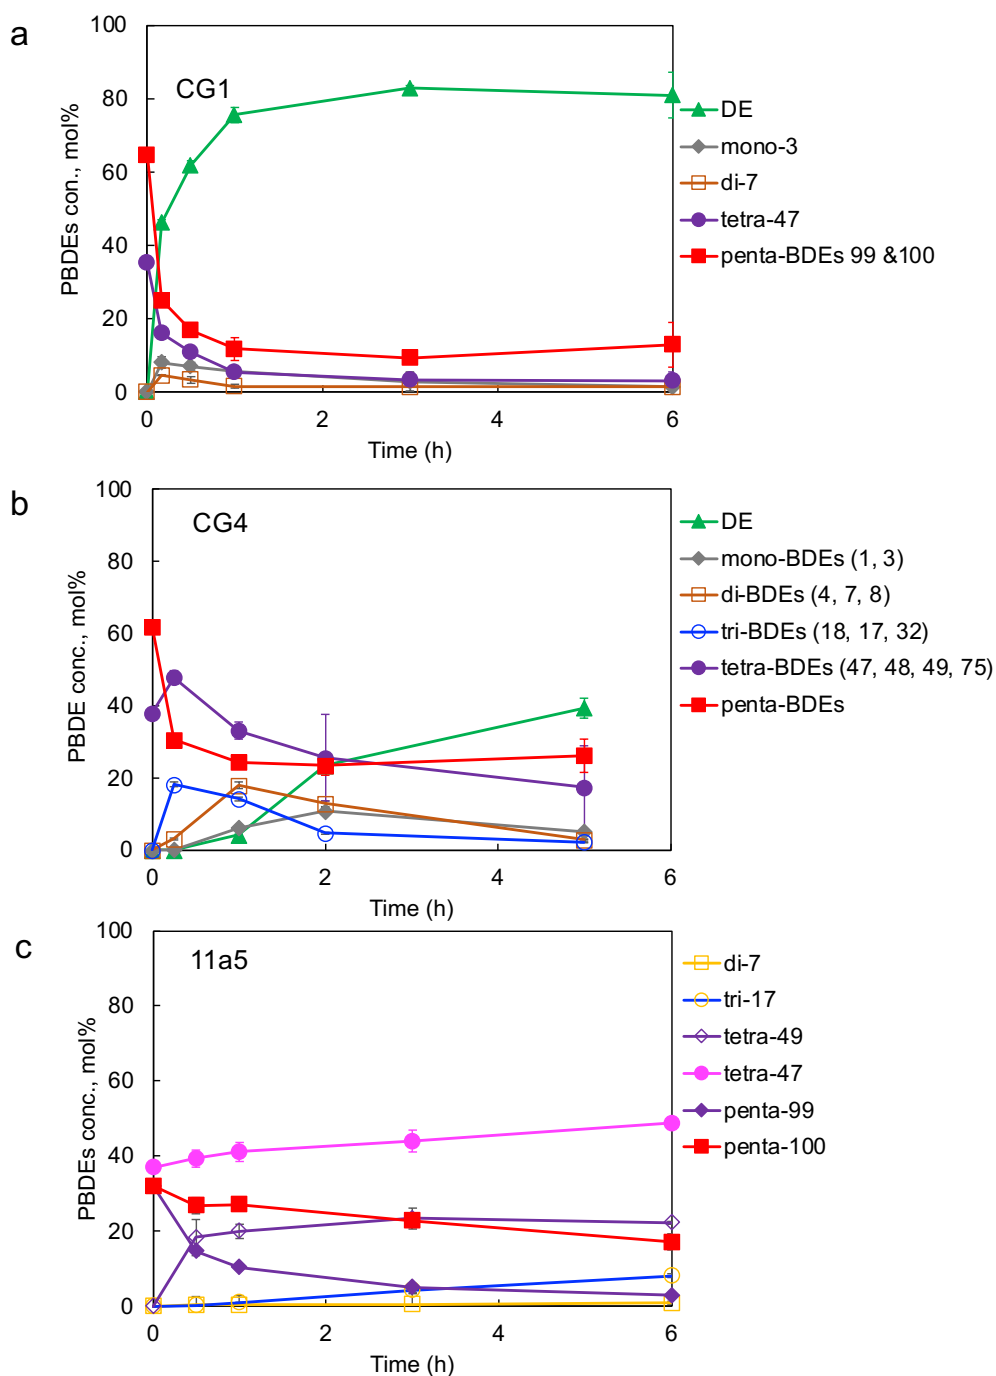

**Figure S7.** Debromination of penta- and tetra-BDEs in *in vitro* enzymatic assays using crude cell extracts from cultures of (a) *Dehalococcoides mccartyi* strain CG1 amended with tetrachloroethene (PCE), (b) *D. mccartyi* strain CG4 amended with PCE, and (c) *D. mccartyi* strain 11a5 amended with trichloroethene. DE, diphenyl ether





**Tables.**

**Table S1.** Mass spectra peak area response factors for PBDE homolog groups. Response factors were determined empirically from a mixture of 39 mono- to hepta-BDEs; response factors for each homolog group were calculated as the mean of the peak area response factor for all congeners in a given homolog group in the congener PBDE mixture. The number of congeners in each homolog group in the congener mixture is indicated (n).

|            | Response factors, $\times 10^{-7}$ ppm |        |               |
|------------|----------------------------------------|--------|---------------|
|            | n                                      | mean   | 95% CI        |
| Mono-BDEs  | 3                                      | 2.13   | 2.12–2.14     |
| Di-BDEs    | 7                                      | 2.08   | 2.05–2.11     |
| Tri-BDEs   | 8                                      | 2.51   | 2.48–2.54     |
| Tetra-BDEs | 6                                      | 1.66   | 1.63–1.68     |
| Penta-BDEs | 7                                      | 2.38   | 2.37–2.39     |
| Hexa-BDEs  | 5                                      | 24.16  | 24.07–24.25   |
| Hepta-BDEs | 3                                      | 10.45  | 10.05–10.58   |
| Octa-BDEs  | 3                                      | 12.91  | 12.80–13.02   |
| Nona-BDE   | 1                                      | 155.20 | 153.12–157.28 |
| Deca-BDE   | 1                                      | 292.80 | 290.12–295.48 |

**Table S2.** Primers used in this study.

| <b>Targets</b>             | <b>Primer ID</b> | <b>Sequence 5'-3'</b>   | <b>Product size (bp)</b> | <b>Tm</b> | <b>Reference</b> |
|----------------------------|------------------|-------------------------|--------------------------|-----------|------------------|
| <i>Dehalococcoides</i>     | Dhc-qF2          | GGTAATACGTAGGAAGCAAGCG  | 98                       | 60        | [1]              |
|                            | Dhc-qR           | CCGGTTAAGCCGGGAAATT     |                          |           |                  |
| <i>Dehalogenimonas</i>     | mod-BL-DC-1243f  | GGYACAATGGGTTGCCACCGG   | 127                      | 63        | [2]              |
|                            | BL-DC-1351r      | AACGCGCTATGCTGACACGCGT  |                          |           |                  |
| <i>Dehalobacter</i>        | Dre441F          | GTTAGGGAAGAACGGCATCTGT  | 203                      | 58        | [3]              |
|                            | Dre645R          | CCTCTCCTGTCCTCAAGCCATA  |                          |           |                  |
| <i>Acetobacterium</i>      | Aceto572f        | GGCTCAACCGGTGACATGCA    | 212                      | 63        | [4]              |
|                            | Aceto784r        | ACTGAGTCTCCCCAACACCT    |                          |           |                  |
| <i>Sulfurospirillum</i>    | Sulfuro114f      | GCTAACCTGCCCTTTAGTGG    | 307                      | 59        | [5]              |
|                            | Sulfuro421r      | GTTTACACACCGAAATGCGT    |                          |           |                  |
| <i>Desulfitobacterium</i>  | Dsb1299F         | GTGGGGATGACGTCAAATCA    | 149                      | 58        | [6]              |
|                            | Dsb1448R         | CATGTTCTCGAGTTGCAGAGAA  |                          |           |                  |
| <i>pbrA1/pcbA1</i>         | GY50_1350F       | TTTTGGGTAGGACAGGTTGGA   | 127                      | 60        | [7]              |
|                            | GY50_1350R       | AGGAACAGAGTGCCATTGACG   |                          |           |                  |
| <i>pbrA2</i>               | GY50_1352F       | GCGCCTTCATTGATTGCTTC    | 155                      | 60        | [7]              |
|                            | GY50_1352R       | GTTGCCCAACCTGGTCTCG     |                          |           |                  |
| <i>pbrA3</i>               | GY50_1427F       | GTTAAAGATCGGCGTGGTTG    | 94                       | 60        | [7]              |
|                            | GY50_1427R       | TCTGGACGGATGGTGTTC      |                          |           |                  |
| <i>pteA_TZ50</i>           | pteA848F         | CCATAGGCACCTTGGTAGCA    | 150                      | 60        | [8]              |
|                            | pteA998R         | TCACCAATGCCTGCTAACGT    |                          |           |                  |
| <i>tceA_TZ50/tceA_11a5</i> | tceA1279F        | ATCCAGATTATGACCCTGGTGAA | 58                       | 58        | [9]              |
|                            | tceA1336R        | GCGGCATATATTAGGGCATCTT  |                          |           |                  |
| <i>bdeA</i>                | bdeA628F         | CTGCGTCAGGTAGTCCGTTT    | 131                      | 60        | [8]              |
|                            | bdeA758R         | GCCGCTTCGTCTACGTTTTT    |                          |           |                  |
| <i>pcbA4/11a5_e001</i>     | CG4-F (759F)     | TGAAGATGTTGACGCAGCCT    | 175                      | 60        | [10]             |
|                            | CG4-R (843R)     | GCGCATACTCCAGGTGAAGA    |                          |           |                  |

**Table S3.** Sensitivity and amplification metrics for real-time quantitative PCR (qPCR) primers used in this study. LOD, limit of detection; LOQ, limit of quantification; Efficiency, amplification efficiency; r, correlation coefficient of six-point standard curve (range: 5E+02–5E+07 /ml).

|                            | LOD, /ml | LOQ, /ml | Efficiency, % | <i>r</i> |
|----------------------------|----------|----------|---------------|----------|
| <i>pbrA1/pcbA1</i>         | 5.77E+01 | 1.14E+02 | 102.5         | 99.8     |
| <i>pbrA2</i>               | 1.01E+01 | 3.20E+01 | 104.3         | 99.7     |
| <i>pbrA3</i>               | 2.10E+01 | 5.20E+01 | 94.7          | 99.9     |
| <i>pteA_TZ50</i>           | 8.40E+01 | 2.13E+02 | 105.6         | 99.7     |
| <i>tceA_TZ50/tceA_11a5</i> | 5.69E+01 | 1.57E+02 | 99.7          | 99.9     |
| <i>bdeA</i>                | 3.40E+01 | 8.90E+01 | 104.2         | 99.8     |
| <i>pcbA4/11a5_e001</i>     | 2.96E+01 | 5.80E+01 | 103.2         | 99.5     |

**Table S4.** *Dehalococcoides mccartyi* strains used in this study .

| Strain | Origins                                                                                 | Halogenated compounds reduced                                  | End Products/<br>Dehalogenation pathway            | Characterized <i>rdh</i>   | References   |
|--------|-----------------------------------------------------------------------------------------|----------------------------------------------------------------|----------------------------------------------------|----------------------------|--------------|
| 11a    | Discharge area of an industrial wastewater treatment station of a chemical plant, China | TCE, <i>trans</i> -DCE, <i>cis</i> -DCE, 1,1,-DCE, VC, 1,2-DCA | Ethene                                             | <i>vcrA</i>                | [11, 12]     |
| 11a5   | Discharge area of an industrial wastewater treatment station of a chemical plant, China | PCE, TCE, <i>trans</i> -DCE, <i>cis</i> -DCE, 1,1,-DCE         | VC (ethene)                                        | <i>pteA</i><br><i>tceA</i> | [11, 13]     |
| 11G    | Sungei Mandai mangrove, Singapore;                                                      | TCE, <i>trans</i> -DCE, <i>cis</i> -DCE, 1,1,-DCE, VC, 1,2-DCA | Ethene                                             | <i>vcrA</i>                | [14]         |
| ANAS2  | a contaminated site at Alameda Naval Air Station in California, USA                     | TCE, <i>cis</i> -DCE, 1,1,-DCE, VC, 1,2-DCA                    | Ethene                                             | <i>vcrA</i>                | [15]         |
| GEO    | A TCE and 1,1,1-TCA dechlorinating anaerobic bioreactor                                 | TCE, <i>trans</i> -DCE, <i>cis</i> -DCE, 1,1,-DCE, VC, 1,2-DCA | Ethene                                             | <i>tceA</i><br><i>vcrA</i> | [16]         |
| CG1    | E-waste contaminated sites, Guiyu, China                                                | PCBs,<br>PCE<br>TBBPA                                          | 33'-meta removal<br>DCEs<br>BPA                    | <i>pcbA1</i>               | [10]<br>[17] |
| CG4    | E-waste contaminated sites, Guiyu, China                                                | PCBs,<br>PCE                                                   | 44'-para > 55'-meta > 33'-<br>meta removal<br>DCEs | <i>pcbA4</i>               | [10]         |
| CG5    | E-waste contaminated sites, Guiyu, China                                                | PCBs<br>PCE                                                    | 33'- and 55'-meta; flanked<br>para removal<br>DCEs | <i>pcbA5</i>               | [10]         |

**Table S5.** Relative abundance of *Dehalococcoides*, *Dehalogenimonas*, and *Dehalobacter* in microbial communities of original soil samples, microcosms (day 60), and enrichments.

|       | <i>Dehalococcoides</i> |            |             | <i>Dehalogenimonas</i> |            |             | <i>Dehalobacter</i> |            |             |
|-------|------------------------|------------|-------------|------------------------|------------|-------------|---------------------|------------|-------------|
|       | Soil                   | Microcosms | Enrichments | Soil                   | Microcosms | Enrichments | Soil                | Microcosms | Enrichments |
| EW-1  | 0.001%                 | 0.005%     | 0.000%      | 0.040%                 | 0.067%     | 0.000%      | 0.002%              | 0.182%     | 0.000%      |
| EW-2  | 0.017%                 | 0.160%     | 1.200%      | 0.339%                 | 0.207%     | 0.000%      | 0.002%              | 0.010%     | 2.952%      |
| EW-3  | 0.000%                 | 0.048%     | 1.900%      | 0.024%                 | 0.045%     | 0.000%      | 0.000%              | 0.002%     | 0.000%      |
| EW-4  | 0.136%                 | 0.019%     | 0.000%      | 0.617%                 | 0.144%     | 0.594%      | 0.011%              | 0.011%     | 0.000%      |
| EW-5  | 0.497%                 | 0.015%     | 0.000%      | 0.532%                 | 3.373%     | 2.068%      | 0.020%              | 0.026%     | 0.652%      |
| EW-6  | 0.022%                 | 0.010%     | 0.000%      | 0.669%                 | 0.566%     | 0.325%      | 0.006%              | 0.021%     | 2.284%      |
| EW-7  | 0.022%                 | 0.008%     | 0.000%      | 0.659%                 | 0.257%     | 0.774%      | 0.006%              | 0.031%     | 0.217%      |
| EW-8  | 0.002%                 | 1.734%     | 6.700%      | 0.124%                 | 0.234%     | 0.000%      | 0.010%              | 0.009%     | 0.000%      |
| EW-9  | 0.001%                 | 0.010%     | 0.000%      | 0.197%                 | 0.119%     | 0.000%      | 0.001%              | 0.008%     | 0.000%      |
| EW-10 | 0.003%                 | 0.012%     | 0.000%      | 0.263%                 | 0.220%     | 0.000%      | 0.002%              | 0.090%     | 0.000%      |
| EW-11 | 0.035%                 | 1.289%     | 5.500%      | 0.189%                 | 0.106%     | 0.000%      | 0.009%              | 0.042%     | 0.000%      |
| EW-12 | 0.005%                 | 0.745%     | 3.800%      | 0.292%                 | 0.133%     | 0.000%      | 0.008%              | 0.053%     | 0.000%      |
| EW-13 | 0.027%                 | 0.395%     | 5.400%      | 0.231%                 | 0.155%     | 0.000%      | 0.001%              | 0.083%     | 0.000%      |
| EW-14 | 0.005%                 | 0.014%     | 0.000%      | 0.261%                 | 3.279%     | 2.453%      | 0.042%              | 0.023%     | 0.205%      |
| EW-15 | 0.010%                 | 0.021%     | 0.000%      | 0.052%                 | 0.163%     | 2.632%      | 0.009%              | 0.037%     | 0.675%      |
| EW-16 | 0.001%                 | 0.004%     | 0.000%      | 0.045%                 | 0.077%     | 0.000%      | 0.000%              | 0.009%     | 0.000%      |
| EW-17 | 0.017%                 | 0.004%     | 0.000%      | 0.549%                 | 0.123%     | 0.000%      | 0.030%              | 0.039%     | 0.000%      |
| EW-18 | 0.002%                 | 0.003%     | 0.000%      | 0.025%                 | 0.515%     | 0.000%      | 0.000%              | 0.017%     | 0.000%      |
| EW-19 | 0.006%                 | 0.202%     | 4.700%      | 0.166%                 | 0.056%     | 0.000%      | 0.002%              | 0.018%     | 0.000%      |
| EW-20 | 0.074%                 | 0.488%     | 2.800%      | 0.955%                 | 0.091%     | 0.000%      | 0.058%              | 0.041%     | 0.000%      |
| EW-21 | 0.008%                 | 0.001%     | 0.000%      | 0.719%                 | 0.077%     | 0.000%      | 0.032%              | 0.012%     | 0.000%      |
| EW-22 | 0.002%                 | 0.007%     | 0.000%      | 0.271%                 | 1.176%     | 0.000%      | 0.010%              | 0.027%     | 0.000%      |
| EW-23 | 0.006%                 | 0.001%     | 0.000%      | 0.089%                 | 0.001%     | 0.000%      | 0.003%              | 0.000%     | 0.000%      |
| EW-24 | 0.002%                 | 0.001%     | 0.000%      | 0.240%                 | 0.000%     | 0.000%      | 0.004%              | 0.000%     | 0.000%      |

**Table S6.** Pearson's correlations ( $r$ ) between bromine removal and cell abundance of obligate OHRB in enrichment cultures.

|       | <i>Dehalococcoides</i> | <i>Dehalogenimonas</i> | <i>Dehalobacter</i> |
|-------|------------------------|------------------------|---------------------|
| EW-2  | 0.66                   | N.A.                   | 0.99                |
| EW-3  | 0.87                   | N.A.                   | N.A.                |
| EW-8  | 0.93                   | N.A.                   | N.A.                |
| EW-11 | 0.98                   | N.A.                   | N.A.                |
| EW-12 | 0.99                   | N.A.                   | N.A.                |
| EW-13 | 0.98                   | N.A.                   | N.A.                |
| EW-19 | 0.96                   | N.A.                   | N.A.                |
| EW-20 | 0.98                   | N.A.                   | N.A.                |
| EW-4  | N.A.                   | 0.92                   | N.A.                |
| EW-5  | N.A.                   | 0.78                   | 0.85                |
| EW-6  | N.A.                   | 0.92                   | 0.99                |
| EW-7  | N.A.                   | 0.99                   | 0.97                |
| EW-14 | N.A.                   | 0.95                   | 0.97                |
| EW-15 | N.A.                   | 0.92                   | 0.91                |

**Table S7.** Metabolites produced by debromination of BDE 183 by *Dehalococcoides mccartyi* strains CG1, CG4, and 11a5 after cultivation for 9 months (*in vivo*), as well in enzymatic assays of crude cell extracts (*in vitro*) of cultures supplied a penta- and tetra-BDE mixture as an electron acceptor and cultivated for 7 d at 30 °C. Abundance of BDE congeners is indicated as the fraction of total BDE composition.

| Name             | IUPAC    | <i>in vivo</i> , % |     |      | <i>in vitro</i> assay, % |      |      |
|------------------|----------|--------------------|-----|------|--------------------------|------|------|
|                  |          | CG1                | CG4 | 11a5 | CG1                      | CG4  | 11a5 |
| <b>DE</b>        |          |                    |     |      |                          | 0.6  |      |
| <b>mono-1</b>    | 2        |                    |     |      |                          | 0.2  |      |
| <b>di-7</b>      | 24       |                    |     | 3.0  |                          |      |      |
| <b>di-8</b>      | 2-4      |                    |     |      |                          | 0.6  |      |
| <b>tri-30</b>    | 246      |                    |     | 2.4  |                          |      |      |
| <b>tri-17</b>    | 24-2     |                    |     |      |                          | 2.2  |      |
| <b>tri-28</b>    | 24-4     |                    |     | 7.3  |                          |      |      |
| <b>tetra 53</b>  | 25-26    |                    |     |      |                          |      |      |
| <b>tetra-49</b>  | 24-25    |                    |     |      |                          | 0.7  |      |
| <b>tetra-71</b>  | 26-34    |                    |     |      |                          | 0.7  |      |
| <b>tetra-47</b>  | 24-24    |                    |     |      |                          | 1.4  |      |
| <b>tetra-74</b>  | 245-4    |                    |     | 6.2  |                          |      |      |
| <b>tetra-66</b>  | 24-34    |                    |     |      |                          | 0.5  |      |
| <b>penta-95</b>  | 236-25   |                    |     |      |                          | 19.5 | 20.9 |
| <b>penta-103</b> | 246-25   |                    |     | 9.7  |                          | 0.4  | 1.8  |
| <b>penta-99</b>  | 245-24   |                    |     |      |                          | 1.2  |      |
| <b>penta-118</b> | 245-34   |                    |     | 4.9  |                          |      |      |
| <b>penta-85</b>  | 234-24   |                    |     |      |                          | 2.6  | 2.4  |
| <b>hexa-154</b>  | 245-246  |                    |     |      |                          | 3.5  | 10.4 |
| <b>hexa-144</b>  | 2346-25  |                    |     |      |                          | 2.4  | 0.9  |
| <b>hexa-138</b>  | 234-245  |                    |     |      |                          | 0.5  |      |
| <b>hepta-183</b> | 2346-245 | 100                | 100 | 66.4 | 100                      | 63.1 | 63.5 |



**Table S8.** (a) Proteins detected in strain CG1 during PBDE debromination.

| Accession ID          | Locus_tag           | Protein annotation                                              | Averaged abundance | Relative abundance, (%) |
|-----------------------|---------------------|-----------------------------------------------------------------|--------------------|-------------------------|
| WP_012882149.1        | X792_RS04400        | elongation factor Tu                                            | 3.66E+07           | 48.39                   |
| WP_012881820.1        | X792_RS02605        | F0F1 ATP synthase subunit alpha                                 | 1.14E+07           | 15.04                   |
| WP_023651701.1        | X792_RS00130        | TrkA family potassium uptake protein                            | 4.85E+06           | 6.41                    |
| <b>WP_041331460.1</b> | <b>X792_RS06970</b> | <b>reductive dehalogenase</b>                                   | <b>5.66E+06</b>    | <b>7.48</b>             |
| WP_041330877.1        | X792_RS03735        | 2-isopropylmalate synthase                                      | 4.70E+06           | 6.21                    |
| WP_041330976.1        | X792_RS04385        | 50S ribosomal protein L11                                       | 3.36E+06           | 4.44                    |
| WP_012882465.1        | X792_RS06430        | co-chaperone GroES                                              | 2.08E+06           | 2.75                    |
| WP_012881860.1        | X792_RS02820        | DNA-directed RNA polymerase subunit beta                        | 1.63E+06           | 2.16                    |
| WP_041331321.1        | X792_RS06325        | hypothetical protein                                            | 1.38E+06           | 1.83                    |
| WP_012882718.1        | X792_RS07740        | recombinase RecA                                                | 1.28E+06           | 1.70                    |
| WP_012882466.1        | X792_RS06435        | chaperonin GroEL                                                | 7.59E+05           | 1.00                    |
| WP_041330550.1        | X792_RS01275        | formate dehydrogenase-N subunit alpha                           | 7.41E+05           | 0.98                    |
| WP_041331598.1        | X792_RS07490        | DUF3068 domain-containing protein                               | 5.64E+05           | 0.75                    |
| WP_041330621.1        | X792_RS01790        | ATP-dependent metallopeptidase<br>FtsH/Yme1/Tma family protein  | 3.53E+05           | 0.47                    |
| WP_041330465.1        | X792_RS00960        | AbrB/MazE/SpoVT family DNA-binding<br>domain-containing protein | 3.11E+05           | 0.41                    |

(b) Proteins detected in strain CG4 during PBDE debromination.

| Accession ID          | Locus_tag           | Protein annotation                                | Averaged abundance | Relative abundance, (%) |
|-----------------------|---------------------|---------------------------------------------------|--------------------|-------------------------|
| <b>WP_041340852.1</b> | <b>X793_RS00330</b> | <b>reductive dehalogenase</b>                     | <b>2.03E+07</b>    | <b>50.77</b>            |
| WP_041343058.1        | X793_RS06320        | chaperonin GroEL                                  | 3.39E+06           | 8.47                    |
| WP_052470928.1        | X793_RS01255        | response regulator transcription factor           | 4.18E+06           | 10.44                   |
| WP_080768397.1        | X793_RS06730        | PAS domain S-box protein                          | 4.60E+06           | 11.50                   |
| WP_041341847.1        | X793_RS03180        | sodium-translocating pyrophosphatase              | 1.99E+06           | 4.97                    |
| WP_041343158.1        | X793_RS06590        | winged helix-turn-helix transcriptional regulator | 1.18E+06           | 2.94                    |
| WP_041341828.1        | X793_RS03125        | hypothetical protein                              | 9.55E+05           | 2.39                    |
| WP_041342412.1        | X793_RS04675        | leucyl aminopeptidase                             | 6.95E+05           | 1.74                    |
| WP_010937112.1        | X793_RS06315        | co-chaperone GroES                                | 5.61E+05           | 1.40                    |
| WP_041340780.1        | X793_RS00140        | Trk system potassium transporter TrkA             | 3.69E+05           | 0.92                    |
| WP_010936996.1        | X793_RS05745        | DUF1508 domain-containing protein                 | 4.16E+05           | 1.04                    |
| WP_041342363.1        | X793_RS04470        | inositol-3-phosphate synthase                     | 2.92E+05           | 0.73                    |
| WP_010936699.1        | X793_RS04550        | elongation factor Tu                              | 1.65E+05           | 0.41                    |
| WP_041341240.1        | X793_RS01385        | hypothetical protein                              | 1.21E+05           | 0.30                    |
| WP_010936411.1        | X793_RS02720        | cell division protein FtsZ                        | 7.98E+05           | 1.99                    |

(c) Proteins detected in strain 11a5 during PBDE debromination.

| Accession ID          | Locus_tag             | Protein annotation                       | Averaged abundance | Relative abundance, (%) |
|-----------------------|-----------------------|------------------------------------------|--------------------|-------------------------|
| WP_011309438.1        | Dm11a5_RS04460        | elongation factor Tu                     | 4.53E+07           | 35.90                   |
| WP_011309787.1        | Dm11a5_RS06170        | chaperonin GroEL                         | 1.60E+07           | 12.66                   |
| <b>WP_034375880.1</b> | <b>Dm11a5_RS07840</b> | <b>reductive dehalogenase</b>            | <b>1.52E+07</b>    | <b>12.05</b>            |
| <b>WP_062900263.1</b> | <b>Dm11a5_RS06655</b> | <b>reductive dehalogenase</b>            | <b>1.12E+07</b>    | <b>8.85</b>             |
| WP_034376728.1        | Dm11a5_RS01605        | hypothetical protein                     | 1.01E+07           | 8.02                    |
| WP_034376260.1        | Dm11a5_RS06060        | hypothetical protein                     | 7.80E+06           | 6.18                    |
| WP_011309441.1        | Dm11a5_RS04490        | GNAT family N-acetyltransferase          | 5.87E+06           | 4.65                    |
| WP_011309786.1        | Dm11a5_RS06165        | co-chaperone GroES                       | 3.23E+06           | 2.56                    |
| WP_011308770.1        | Dm11a5_RS00480        | HAMP domain-containing protein           | 2.81E+06           | 2.22                    |
| WP_011929022.1        | Dm11a5_RS03230        | sodium-translocating pyrophosphatase     | 2.05E+06           | 1.62                    |
| WP_011309118.1        | Dm11a5_RS02630        | DNA-directed RNA polymerase subunit beta | 1.45E+06           | 1.15                    |
| WP_011309989.1        | Dm11a5_RS07410        | DUF3068 domain-containing protein        | 1.42E+06           | 1.12                    |
| WP_015407039.1        | Dm11a5_RS03180        | hypothetical protein                     | 8.73E+05           | 0.69                    |
| WP_034376825.1        | Dm11a5_RS00840        | DUF4186 family protein                   | 1.28E+06           | 1.01                    |
| WP_011309757.1        | Dm11a5_RS06025        | molecular chaperone DnaJ                 | 9.06E+05           | 0.72                    |
| WP_011929073.1        | Dm11a5_RS03575        | glutamine-hydrolyzing GMP synthase       | 8.83E+05           | 0.70                    |

1. Freeborn RA, West KA, Bhupathiraju VK, Chauhan S, Rahm BG, Richardson RE *et al* (2005). Phylogenetic analysis of TCE-dechlorinating consortia enriched on a variety of electron donors. *Environ Sci Technol* **39**: 8358-8368.
2. Chen J, Bowman KS, Rainey FA, Moe WM (2014). Reassessment of PCR primers targeting 16S rRNA genes of the organohalide-respiring genus *Dehalogenimonas*. *Biodegradation* **25**: 747-756.
3. Smits TH, Devenoges C, Szynalski K, Maillard J, Holliger C (2004). Development of a real-time PCR method for quantification of the three genera *Dehalobacter*, *Dehalococcoides*, and *Desulfitobacterium* in microbial communities. *J Microbiol Methods* **57**: 369-378.
4. Duhamel M, Edwards EA (2006). Microbial composition of chlorinated ethene-degrading cultures dominated by *Dehalococcoides*. *FEMS Microbiol Ecol* **58**: 538-549.
5. Löffler FE, Sun Q, Li JR, Tiedje JM (2000). 16S rRNA gene-based detection of tetrachloroethene-dechlorinating *Desulfuromonas* and *Dehalococcoides* species. *Appl Environ Microbiol* **66**: 1369-1374.
6. Ding C, Zhao S, He J (2014). A *Desulfitobacterium* sp. strain PR reductively dechlorinates both 1,1,1-trichloroethane and chloroform. *Environmental microbiology* **16**: 3387-3397.
7. Ding C, Rogers MJ, Yang KL, He J (2017). Loss of the *ssrA* genome island led to partial debromination in the PBDE respiring *Dehalococcoides mccartyi* strain GY50. *Environ Microbiol* **19**: 2906-2915.
8. Zhao S, Rogers MJ, Cao L, Ding C, He J (2021). Identification of reductive dehalogenases that mediate complete debromination of penta- and tetrabrominated diphenyl ethers in *Dehalococcoides* spp. *Appl Environ Microbiol* **87**: e0060221.
9. Johnson DR, Lee PKH, Holmes VF, Alvarez-Cohen L (2005). An internal reference technique for accurately quantifying specific mRNAs by real-time PCR with application to the *tceA* reductive dehalogenase gene. *Appl Environ Microbiol* **71**: 3866-3871.
10. Wang S, Chng KR, Wilm A, Zhao S, Yang K-L, Nagarajan N *et al* (2014). Genomic characterization of three unique *Dehalococcoides* that respire on persistent polychlorinated biphenyls. *Proc Natl Acad Sci USA* **111**: 12103-12108.
11. Lee PK, Cheng D, West KA, Alvarez-Cohen L, He J (2013). Isolation of two new *Dehalococcoides mccartyi* strains with dissimilar dechlorination functions and their characterization by comparative genomics via microarray analysis. *Environ Microbiol* **15**: 2293-2305.
12. Low A, Shen Z, Cheng D, Rogers MJ, Lee PKH, He J (2015). A comparative genomics and reductive dehalogenase gene transcription study of two chloroethene-respiring bacteria, *Dehalococcoides mccartyi* strains MB and 11a. *Scientific Reports* **5**: 15204.
13. Zhao S, Ding C, He J (2017). Genomic characterization of *Dehalococcoides mccartyi* strain 11a5 reveals a circular extrachromosomal genetic element and a new tetrachloroethene reductive dehalogenase gene. *FEMS Microbiol Ecol* **93**.
14. Zhao S, He J (2019). Reductive dechlorination of high concentrations of chloroethenes by a *Dehalococcoides mccartyi* strain 11G. *FEMS Microbiol Ecol* **95**.
15. Lee PK, Cheng D, Hu P, West KA, Dick GJ, Brodie EL *et al* (2011). Comparative genomics of two newly isolated *Dehalococcoides* strains and an enrichment using a genus microarray. *ISME J* **5**: 1014-1024.
16. Ding C, Rogers MJ, He J (2020). *Dehalococcoides mccartyi* strain GEO12 has a natural tolerance to chloroform inhibition. *Environ Sci Technol* **54**: 8750-8759.
17. Ramaswamy R, Zhao S, Bae S, He J (2021). Debromination of TetraBromoBisphenol-A (TBBPA) depicting the metabolic versatility of *Dehalococcoides*. *J Hazard Mater* **419**: 126408.
